# Supplementary material
Source: publisher figshare collection journal article supplement (https://frontiersin.figshare.com/ndownloader/files/28540401)
Supplement: Supplementary file [file 28540401]

A

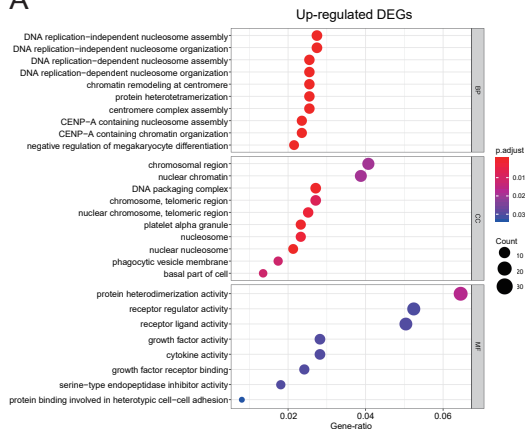

B

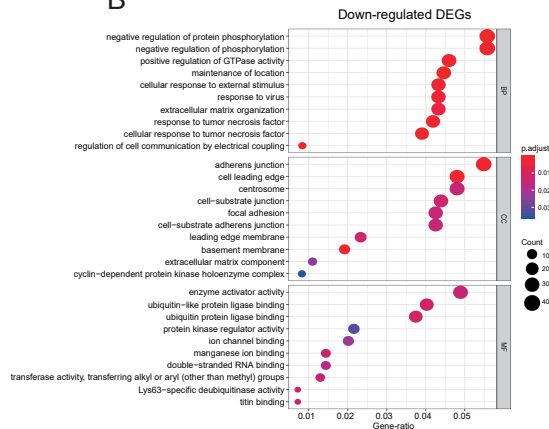

**Supplementary Figure 1. GO term classification of DEGs following NRP1 knockdown.** (A) Bubble plot of GO terms of upregulated DEGs and (B) downregulated DEGs, including biological process (BP), cellular component (CC), and molecular function (MF). GO term description was assigned to y-axis and gene ratio was assigned to horizontal axis as the proportion of differential genes in the whole gene set. The dot size represents the gene counts in a certain GO term.
